# Supplementary material
Source: PubMed Central journal article supplement (PMC139215)

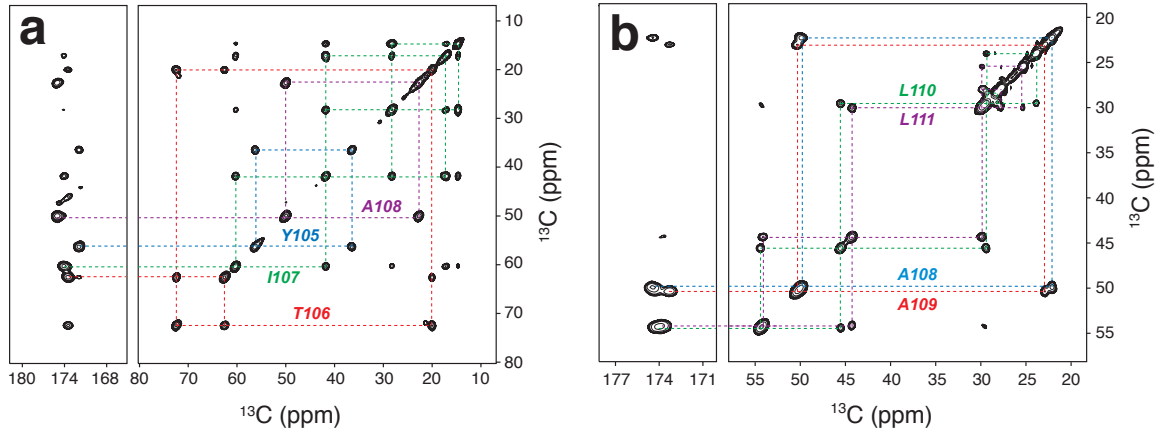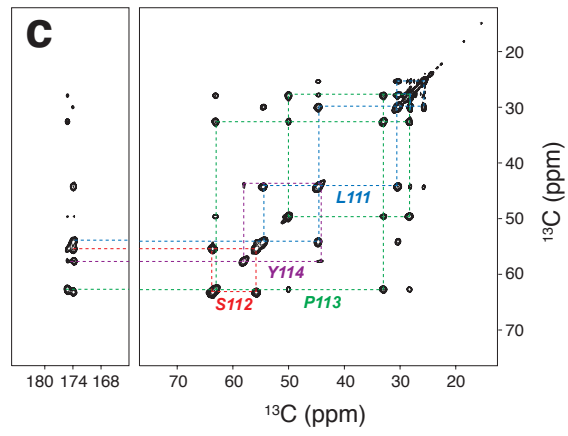

Supplement: pnas_99_26_16748__3.pdf [file pnas_99_26_16748__3.pdf]

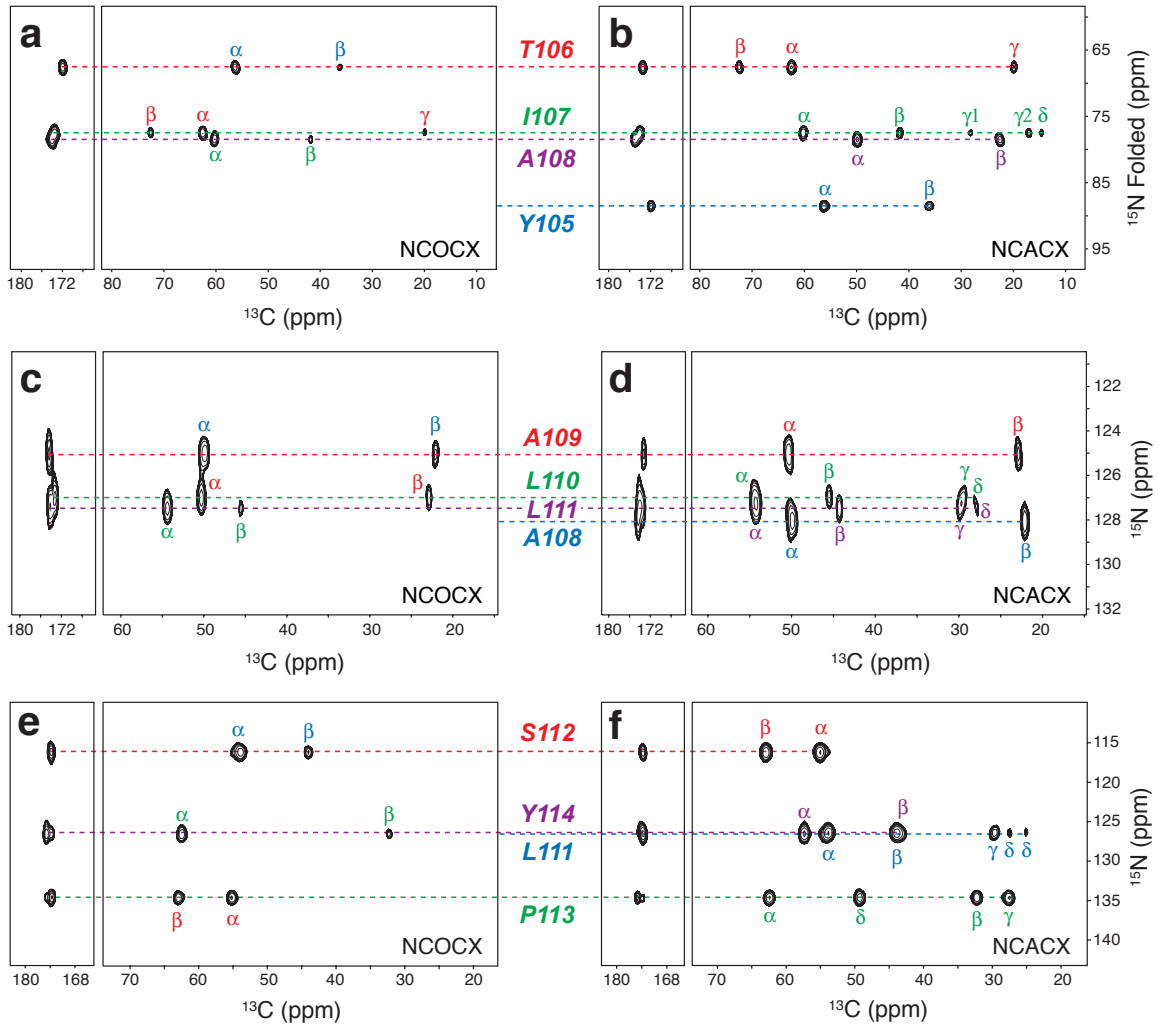

Supplement: pnas_99_26_16748__5.pdf [file pnas_99_26_16748__5.pdf]
